# Supplementary material for: Brain Temperature as an Indicator of Cognitive Function in Traumatic Brain Injury Patients
Source: MDPI journal article supplement (doi:10.3390/metabo14010017), 2023-12-27
Supplement: s1 [file s1]

**Table S1.** The relationship between MRI measures and cognitive function test scores

|                  |                                 | WAIS          |                |               |                      |                         |                |                  | PASAT-2s      | PASAT-1s      | TMT-A         | TMT-B         |
|------------------|---------------------------------|---------------|----------------|---------------|----------------------|-------------------------|----------------|------------------|---------------|---------------|---------------|---------------|
|                  |                                 | Verbal IQ     | Performance IQ | Full scale IQ | Verbal comprehension | perceptual organization | Working memory | Processing speed |               |               |               |               |
| T <sub>Cho</sub> | Correlation                     | 0.435         | 0.490          | 0.495         | 0.492                | 0.223                   | 0.333          | 0.646            | 0.795         | 0.849         | -0.144        | -0.445        |
|                  | P-value (FDR-corrected P-value) | 0.329 (0.452) | 0.264 (0.452)  | 0.259 (0.452) | 0.262 (0.452)        | 0.630 (0.693)           | 0.466 (0.570)  | 0.117 (0.429)    | 0.032 (0.176) | 0.016 (0.176) | 0.758 (0.758) | 0.317 (0.452) |
| T <sub>Cre</sub> | Correlation                     | 0.636         | 0.768          | 0.743         | 0.603                | 0.558                   | 0.609          | 0.872            | 0.890         | 0.778         | -0.460        | -0.726        |
|                  | P-value (FDR-corrected P-value) | 0.125 (0.186) | 0.044 (0.117)  | 0.056 (0.117) | 0.152 (0.186)        | 0.193 (0.212)           | 0.147 (0.186)  | 0.011 (0.061)    | 0.007 (0.061) | 0.039 (0.117) | 0.299 (0.299) | 0.064 (0.117) |
| T <sub>NAA</sub> | Correlation                     | 0.677         | 0.709          | 0.734         | 0.733                | 0.429                   | 0.512          | 0.810            | 0.930         | 0.793         | -0.429        | -0.646        |
|                  | P-value (FDR-corrected P-value) | 0.095 (0.149) | 0.075 (0.138)  | 0.060 (0.134) | 0.061 (0.134)        | 0.337 (0.337)           | 0.240 (0.293)  | 0.027 (0.121)    | 0.002 (0.022) | 0.033 (0.121) | 0.336 (0.337) | 0.117 (0.161) |
| T <sub>AWC</sub> | Correlation                     | 0.447         | 0.540          | 0.525         | 0.473                | 0.294                   | 0.403          | 0.702            | 0.806         | 0.767         | -0.235        | -0.530        |
|                  | P-value (FDR-corrected P-value) | 0.315 (0.433) | 0.211 (0.414)  | 0.226 (0.414) | 0.284 (0.433)        | 0.523 (0.575)           | 0.370 (0.452)  | 0.079 (0.290)    | 0.029 (0.242) | 0.044 (0.242) | 0.612 (0.612) | 0.221 (0.414) |
| ChoCr            | Correlation                     | -0.497        | -0.459         | -0.495        | -0.585               | -0.324                  | -0.245         | -0.394           | -0.437        | -0.032        | 0.646         | 0.461         |
|                  | P-value (FDR-corrected P-value) | 0.257 (0.514) | 0.300 (0.514)  | 0.259 (0.514) | 0.167 (0.514)        | 0.479 (0.585)           | 0.596 (0.656)  | 0.382 (0.525)    | 0.327 (0.514) | 0.946 (0.946) | 0.117 (0.514) | 0.298 (0.514) |
| NAACr            | Correlation                     | 0.193         | 0.171          | 0.213         | 0.114                | 0.088                   | 0.242          | 0.278            | 0.297         | 0.787         | 0.358         | 0.000         |
|                  | P-value (FDR-corrected P-value) | 0.678 (0.936) | 0.714 (0.936)  | 0.647 (0.936) | 0.807 (0.936)        | 0.851 (0.936)           | 0.601 (0.936)  | 0.546 (0.936)    | 0.518 (0.936) | 0.036 (0.396) | 0.431 (0.936) | 1.000 (1.000) |

p and r values for correlation tests between MRI measures and cognitive function test scores after adjusting for age and time lapsed from injury. Abbreviation: T<sub>Cho</sub> = brain temperature derived from choline; T<sub>Cr</sub> = brain temperature derived from creatine; T<sub>NAA</sub> = brain temperature derived from N-acetylaspartate; T<sub>AWC</sub> = brain temperature derived by amplitude-weighted combination; WAIS = Wechsler Adult Intelligence Scale; PASAT-2s = 2 s paced auditory serial addition test; PASAT-1s = 1 s paced auditory serial addition test; TMT = trail making test.
